# Supplementary material
Source: ML conference proceedings conference paper supplement (https://proceedings.neurips.cc/paper_files/paper/2012/hash/bad5f33780c42f2588878a9d07405083-Abstract.html)
Supplement: Supplementary file [file bad5f33780c42f2588878a9d07405083-Supplemental.zip]

---

# Supplementary material for: Convergence Rate Analysis of MAP Coordinate Minimization Algorithms

---

**Ofer Meshi**  
meshi@cs.huji.ac.il

**Tommi Jaakkola**  
tommi@csail.mit.edu

**Amir Globerson**  
gamir@cs.huji.ac.il

## 1 Primal Convergence Rate

For clarity, we define

$$\mu \cdot \theta = \sum_i \sum_{x_i} \mu_i(x_i) \theta_i(x_i) + \sum_c \sum_{x_c} \mu_c(x_c) \theta_c(x_c) \quad (1)$$

$$H(\mu) = \sum_i H(\mu_i(\cdot)) + \sum_c H(\mu_c(\cdot)) \quad (2)$$

**Theorem 1.1.** Denote by  $P_\tau^*$  the optimum of the smoothed primal PMAP $_\tau$ . Then for any set of dual variables  $\delta$ , if  $\|\nabla F(\delta)\|_\infty \leq \epsilon \in R(\tau)$  (for a range of values  $R(\tau)$ ), then  $P_\tau^* - P_\tau(\tilde{\mu}) \leq C_0 \epsilon$ , where  $C_0$  is a constant that depends only on the parameters  $\theta$ , independent of  $\tau$ , and  $\tilde{\mu}$  represents the set of locally consistent marginals from Algorithm 1 in response to  $\mu = \mu(\delta)$ .

*Proof.*  $\|\nabla F(\delta)\|_\infty \leq \epsilon$  guarantees that  $\mu = \mu(\delta)$  are  $\epsilon$ -consistent in the sense that  $|\mu_i(x_i) - \mu_c(x_i)| \leq \epsilon$  for all  $c, i \in c$  and  $x_i$ . Algorithm 1 maps any such  $\epsilon$ -consistent  $\mu$  to locally consistent marginals  $\tilde{\mu}$  such that

$$|\mu_i(x_i) - \tilde{\mu}_i(x_i)| \leq 3\epsilon N_{\max}, \quad |\mu_c(x_c) - \tilde{\mu}_c(x_c)| \leq 2\epsilon N_{\max}^2, \quad (3)$$

for all  $i, x_i, c$ , and  $x_c$ , where  $N_{\max} = \max\{\max_i N_i, \max_c N_c\}$ . In other words,  $\|\mu - \tilde{\mu}\|_\infty \leq K\epsilon$ . This can be easily derived from the update in Algorithm 1 and the fact that  $|\mu_i(x_i) - \mu_c(x_i)| \leq \epsilon$ .

Next, it can be shown that  $F(\delta) = P_\tau(\mu(\delta))$ . And it follows that  $P_\tau^* \leq F(\delta) \leq P_\tau(\mu)$ , where the first inequality follows from weak duality.

Thus we have:

$$P_\tau^* \leq P_\tau(\mu) = \mu \cdot \theta + \frac{1}{\tau} H(\mu) = (\tilde{\mu} + \mu - \tilde{\mu}) \cdot \theta + \frac{1}{\tau} H(\tilde{\mu}) + \frac{1}{\tau} (H(\mu) - H(\tilde{\mu})) \quad (4)$$

$$\leq P_\tau(\tilde{\mu}) + \|\mu - \tilde{\mu}\|_\infty \|\theta\|_1 + \frac{1}{\tau} (H(\mu) - H(\tilde{\mu})) \quad (5)$$

$$\leq P_\tau(\tilde{\mu}) + K\epsilon \|\theta\|_1 + \frac{1}{\tau} (H(\mu) - H(\tilde{\mu})) \quad (6)$$

Where we have used Holder's inequality for the first inequality and Eq. (3) for the second inequality.

It remains to bound  $\frac{1}{\tau} (H(\mu) - H(\tilde{\mu}))$  by a linear function of  $\epsilon$ . We note that it is impossible to achieve such a bound in general (e.g., see [1]). However, since the entropy is bounded the difference is also bounded. Now, if we also restrict  $\epsilon$  to be large enough  $\epsilon \geq \frac{1}{\tau}$ , then we obtain the bound:

$$\frac{1}{\tau} (H(\mu) - H(\tilde{\mu})) \leq \frac{1}{\tau} H_{\max} \leq \epsilon H_{\max} \quad (7)$$

We thus obtain that Eq. (6) is of the form  $P_\tau(\tilde{\mu}) + O(\epsilon)$  and the result follows.

For the high-accuracy regime (small  $\epsilon$ ) we provide a similar bound for the case  $\epsilon \leq O(e^{-\tau})$ . Let  $v = \mu - \tilde{\mu}$ , so we have:

$$\begin{aligned} H(\mu) - H(\tilde{\mu}) &= H(\tilde{\mu} + v) - H(\tilde{\mu}) \\ &\leq H(\tilde{\mu}) + \nabla H(\tilde{\mu})^\top v - H(\tilde{\mu}) \\ &= - \sum_i \sum_{x_i} v_i(x_i) \log \tilde{\mu}_i(x_i) - \sum_c \sum_{x_c} v_c(x_c) \log \tilde{\mu}_c(x_c) \end{aligned}$$

where the inequality follows from the concavity of entropy, and the second equality is true because  $\sum_{x_i} v_i(x_i) = 0$  and similarly for  $v_c(x_c)$ . Now, from the definition of  $\mu_i(x_i; \delta)$  we obtain the following bound:

$$\mu_i(x_i; \delta) = \frac{1}{Z_i} e^{\tau(\theta_i(x_i) + \sum_{c:i \in c} \delta_{ci}(x_i))} \geq \frac{1}{|X_i|} e^{-2\tau(\|\theta_i\|_\infty + \|\delta_i\|_1)}$$

We will show below (Lemma 1.2) that  $\|\delta_i\|_1$  remains bounded by a constant  $A$  independent of  $\tau$ . Thus we can write:

$$\mu_i(x_i; \delta) \geq \frac{1}{|X_{\max}|} e^{-2\tau(\|\theta_i\|_\infty + A)}$$

where  $|X_{\max}| = \max\{\max_i |X_i|, \max_c |X_c|\}$ . We define  $\gamma_0 = \frac{1}{(2|X_{\max}|)^\tau} e^{-2\tau(\|\theta_i\|_\infty + A)}$ , and thus for any  $\tau \geq 1$  we have that  $\mu_i(x_i; \delta)$  is bounded away from zero by  $2^{\tau} \gamma_0$ . Since we assume that  $\epsilon \leq \gamma_0$ , we can bound  $\tilde{\mu}$  from below by  $\gamma_0$ . As a result, since  $\|v_i\|_\infty \leq K\epsilon$ ,

$$-\frac{1}{\tau} \sum_i \sum_{x_i} v_i(x_i) \log \tilde{\mu}_i(x_i) \leq -\frac{1}{\tau} (\log \gamma_0) |X_i| K \epsilon = (2(\|\theta_i\|_\infty + A) + \log(2|X_{\max}|)) |X_i| K \epsilon$$

and similarly for the other entropy terms.

Again, we obtain that Eq. (6) is of the form  $P_\tau(\tilde{\mu}) + O(\epsilon)$  and the result holds.

In conclusion, we have shown that if  $\|\nabla F(\delta)\|_\infty \leq \epsilon$ , then for large values  $\epsilon \geq \frac{1}{\tau}$  and small values  $\epsilon \leq \frac{1}{(2|X_{\max}|)^\tau} e^{-2\tau(\|\theta_i\|_\infty + A)}$  we have that:  $P_\tau^* - P_\tau(\tilde{\mu}) \leq O(\epsilon)$ . Our analysis does not cover values in the middle range, but we next argue that the covered range is useful.  $\square$

The allowed range of  $\epsilon$  (namely  $\epsilon \in R(\tau)$ ) seems like a restriction. However, as we argue next taking  $\epsilon \geq \frac{1}{\tau}$  (i.e.,  $\epsilon \in R(\tau)$ ) is all we need in order to obtain a desired accuracy in the non-smoothed primal.

Suppose one wants to solve the original problem *PMAP* to within accuracy  $\epsilon'$ . There are two sources of inaccuracy, namely the smoothing and suboptimality. To ensure the desired accuracy, we require that  $P_\tau^* - P^* \leq \alpha\epsilon'$  and likewise  $P_\tau(\tilde{\mu}) - P_\tau^* \leq (1 - \alpha)\epsilon'$ . In other words, we allow  $\alpha\epsilon'$  suboptimality due to smoothing and  $(1 - \alpha)\epsilon'$  due to suboptimality.

For the first condition, it is enough to set the smoothing constant as:  $\tau \geq \frac{H_{\max}}{\alpha\epsilon'}$ . The second condition will be satisfied as long as we use an  $\epsilon$  such that:  $\epsilon \leq \frac{(1-\alpha)\epsilon'}{(K\|\theta\|_1 + H_{\max})}$  (see Eq. (6) and Eq. (7)). If we choose  $\alpha = \frac{H_{\max}}{K\|\theta\|_1 + 2H_{\max}}$  we obtain that this  $\epsilon$  satisfies  $\epsilon \geq \frac{1}{\tau}$  and therefore  $\epsilon \in R(\tau)$ .

**Lemma 1.2.** *Assume  $\delta$  is a set of dual variables satisfying  $F(\delta) \leq F(0)$  where  $F(0)$  is the dual value corresponding to  $\delta = 0$ . We can require  $\sum_{c:i \in c} \delta_{ci}(x_i) = 0$  since  $F(\delta)$  is invariant to constant shifts. Then it holds that:*

$$\sum_{c,i,x_i} |\delta_{ci}(x_i)| = \|\delta\|_1 \leq A \tag{8}$$

where

$$A = 2 \max_i |X_i| \left( F(0) + \sum_i \max_{x_i} |\theta_i(x_i)| + \sum_c \max_{x_c} |\theta_c(x_c)| \right) \tag{9}$$

*Proof.* To show this, we bound

$$\begin{aligned} & \max_{\delta} \sum_{c,i,x_i} r_{ci}(x_i) \delta_{ci}(x_i) \\ & \text{s.t. } F(\delta) \leq F(0) \\ & \sum_{c:i \in c} \delta_{ci}(x_i) = 0 \end{aligned} \quad (10)$$

For any  $r_{ci}(x_i) \in [-1, 1]$ . The dual problem turns out to be:

$$\begin{aligned} & \min_{\mu, \gamma, \alpha} \alpha(F(0) - \sum_{c,x_c} \mu_c(x_c) \theta_c(x_c) - \sum_{i,x_i} \mu_i(x_i) \theta_i(x_i) - \sum_i H(\mu_i(x_i)) - \sum_c H(\mu_c(x_c))) \\ & \text{s.t. } \begin{aligned} & \mu_i(x_i) - \mu_c(x_c) = \frac{r_{ci}(x_i) - \gamma_{ci}}{\alpha} \\ & \mu_i(x_i) \geq 0, \mu_c(x_c) \geq 0 \\ & \sum_{x_i} \mu_i(x_i) = 1, \sum_{x_c} \mu_c(x_c) = 1 \\ & \alpha \geq 0 \end{aligned} \end{aligned} \quad (11)$$

We will next upper bound this minimum with a constant independent of  $r$  and thus obtain an upper bound that holds for all  $r$ . To do this, we will present a feasible assignment to the variables  $\alpha, \mu, \gamma$  above and use the value they attain. First, we set  $\alpha = \hat{\alpha} = 2 \max_i |X_i|$ . Next, we note that for this  $\hat{\alpha}$ , the objective of Eq. (11) is upper bounded by  $A$  (as defined in Eq. (9)). Thus we only need to show that  $\hat{\alpha} = 2 \max_i |X_i|$  is indeed a feasible value, and this will be done by showing feasible values for the other variables denoted by  $\hat{\mu}, \hat{\gamma}$ . First, we set:

$$\hat{\mu}_i(x_i) = \frac{1}{|X_i|}$$

and:

$$\hat{\gamma}_{ci} = \frac{1}{|X_i|} \sum_{x_i} r_{ci}(x_i) \quad (12)$$

Next, we define  $\nu_{ci}(x_i)$  (for all  $c, i, x_i$ ) as follows:

$$\nu_{ci}(x_i) = \hat{\mu}_i(x_i) - \frac{r_{ci}(x_i) - \hat{\gamma}_{ci}}{\hat{\alpha}} \quad (13)$$

It can easily be shown that  $\nu_{ci}(x_i)$  is a valid distribution over  $x_i$  (i.e., non negative and sums to one). Thus we can define:

$$\hat{\mu}_c(x_c) = \prod_{i \in c} \nu_{ci}(x_i) \quad (14)$$

Since  $\hat{\mu}_c(x_c)$  is a product of distributions over the variables in  $c$ , it is also a valid distribution. Thus it follows that all constraints in Eq. (11) are satisfied by  $\hat{\alpha}, \hat{\gamma}, \hat{\mu}$ , and the desired bound holds.  $\square$

## 2 Star improvement bound

We prove the following proposition:

**Proposition 2.1.** *The star update for variable  $x_i$  satisfies:*

$$F(\delta^t) - F(\delta^{t+1}) \geq \frac{1}{4\tau N_i} \|\nabla_{S_i} F(\delta^t)\|_2^2$$

*Proof.* First, we know that the improvement associated with the star update for variable  $x_i$  is:

$$F(\delta^t) - F(\delta^{t+1}) = -\frac{1}{\tau} \log \left( \sum_{x_i} \left( \mu_i^t(x_i) \cdot \prod_{c:i \in c} \mu_c^t(x_i) \right)^{\frac{1}{N_i+1}} \right)^{N_i+1}$$

Therefore, for any probability distributions  $p, q^{(1)}, \dots, q^{(m)}$  we want to prove that:

$$\left( \sum_i \left( p_i \cdot \prod_k q_i^{(k)} \right)^{\frac{1}{m+1}} \right)^{m+1} \leq \exp \left( -\frac{1}{4m} \sum_k \sum_i (p_i - q_i^{(k)})^2 \right)$$

**Lemma 2.2.** For any probability distributions  $p, q^{(1)}, \dots, q^{(m)}$  the following holds:

$$\left( \sum_i \left( p_i \cdot \prod_k q_i^{(k)} \right)^{\frac{1}{m+1}} \right)^{m+1} \leq 1 - \frac{1}{4m} \sum_k \left( \sum_i |p_i - q_i^{(k)}| \right)^2$$

*Proof.*

$$\begin{aligned} \sum_k \left( \sum_i |p_i - q_i^{(k)}| \right)^2 &\leq \sum_k \left( \sum_i (\sqrt{p_i} - \sqrt{q_i^{(k)}})^2 \cdot \sum_i (\sqrt{p_i} + \sqrt{q_i^{(k)}})^2 \right) \\ &= \sum_k \left( 4 - 4 \left( \sum_i \sqrt{p_i q_i^{(k)}} \right)^2 \right) \\ &= 4m - 4 \sum_k \left( \sum_i \sqrt{p_i q_i^{(k)}} \right)^2 \\ &\leq 4m - 4 \sum_k \left( \sum_i \left( p_i \cdot \prod_{k'} q_i^{(k')} \right)^{\frac{1}{m+1}} \right)^{m+1} \\ &= 4m - 4m \left( \sum_i \left( p_i \cdot \prod_{k'} q_i^{(k')} \right)^{\frac{1}{m+1}} \right)^{m+1} \\ \Rightarrow \left( \sum_i \left( p_i \cdot \prod_{k'} q_i^{(k')} \right)^{\frac{1}{m+1}} \right)^{m+1} &\leq 1 - \frac{1}{4m} \sum_k \left( \sum_i |p_i - q_i^{(k)}| \right)^2 \end{aligned}$$

For the first transition see [3] (also in [2] p. 57). The second inequality follows from Theorem 1 in [4].  $\square$

Using Lemma 2.2 the desired result follows since:

$$\begin{aligned} \left( \sum_i \left( p_i \cdot \prod_k q_i^{(k)} \right)^{\frac{1}{m+1}} \right)^{m+1} &\leq 1 - \frac{1}{4m} \sum_k \left( \sum_i |p_i - q_i^{(k)}| \right)^2 \\ &\leq 1 - \frac{1}{4m} \sum_k \sum_i (p_i - q_i^{(k)})^2 \\ &\leq \exp \left( -\frac{1}{4m} \sum_k \sum_i (p_i - q_i^{(k)})^2 \right) \end{aligned}$$

$\square$

### 3 Gradient-based algorithms

In this section we describe the gradient descent and FISTA algorithms used in the experiments.

Algorithm 1: Gradient descent

```
1: for  $t = 1, \dots$  do  
2:    $\delta^{t+1} = \delta^t - \frac{1}{L} \nabla F(\delta^t)$   
3: end for
```

Algorithm 2: FISTA

```
1:  $\bar{\delta}^1 = \delta^0, \quad \alpha^1 = 1$   
2: for  $t = 1, \dots$  do  
3:    $\delta^t = \bar{\delta}^t - \frac{1}{L} \nabla F(\bar{\delta}^t)$   
4:    $\alpha^{t+1} = \frac{1 + \sqrt{1 + 4(\alpha^t)^2}}{2}$   
5:    $\bar{\delta}^{t+1} = \delta^t + \left( \frac{\alpha^t - 1}{\alpha^{t+1}} \right) (\delta^t - \delta^{t-1})$   
6: end for
```

## References

- [1] D. Berend and A. Kontorovich. A reverse pinsker inequality. *CoRR*, abs/1206.6544, 2012.
- [2] T. Kailath. The divergence and bhattacharyya distance measures in signal selection. *Communication Technology, IEEE Transactions on*, 15(1):52–60, february 1967.
- [3] C. Kraft. Some conditions for consistency and uniform consistency of statistical procedures. In *Univ. of California Publ. in Statistics, vol. 1*, pages 125–142. Univ. of California, Berkeley, 1955.
- [4] K. Matusita. On the notion of affinity of several distributions and some of its applications. *Annals of the Institute of Statistical Mathematics*, 19:181–192, 1967. 10.1007/BF02911675.
